# Supplementary material
Source: PubMed Central journal article supplement (PMC7098725)
Supplement: jciinsight-5-131437-s156.pdf [file jciinsight-5-131437-s156.pdf]

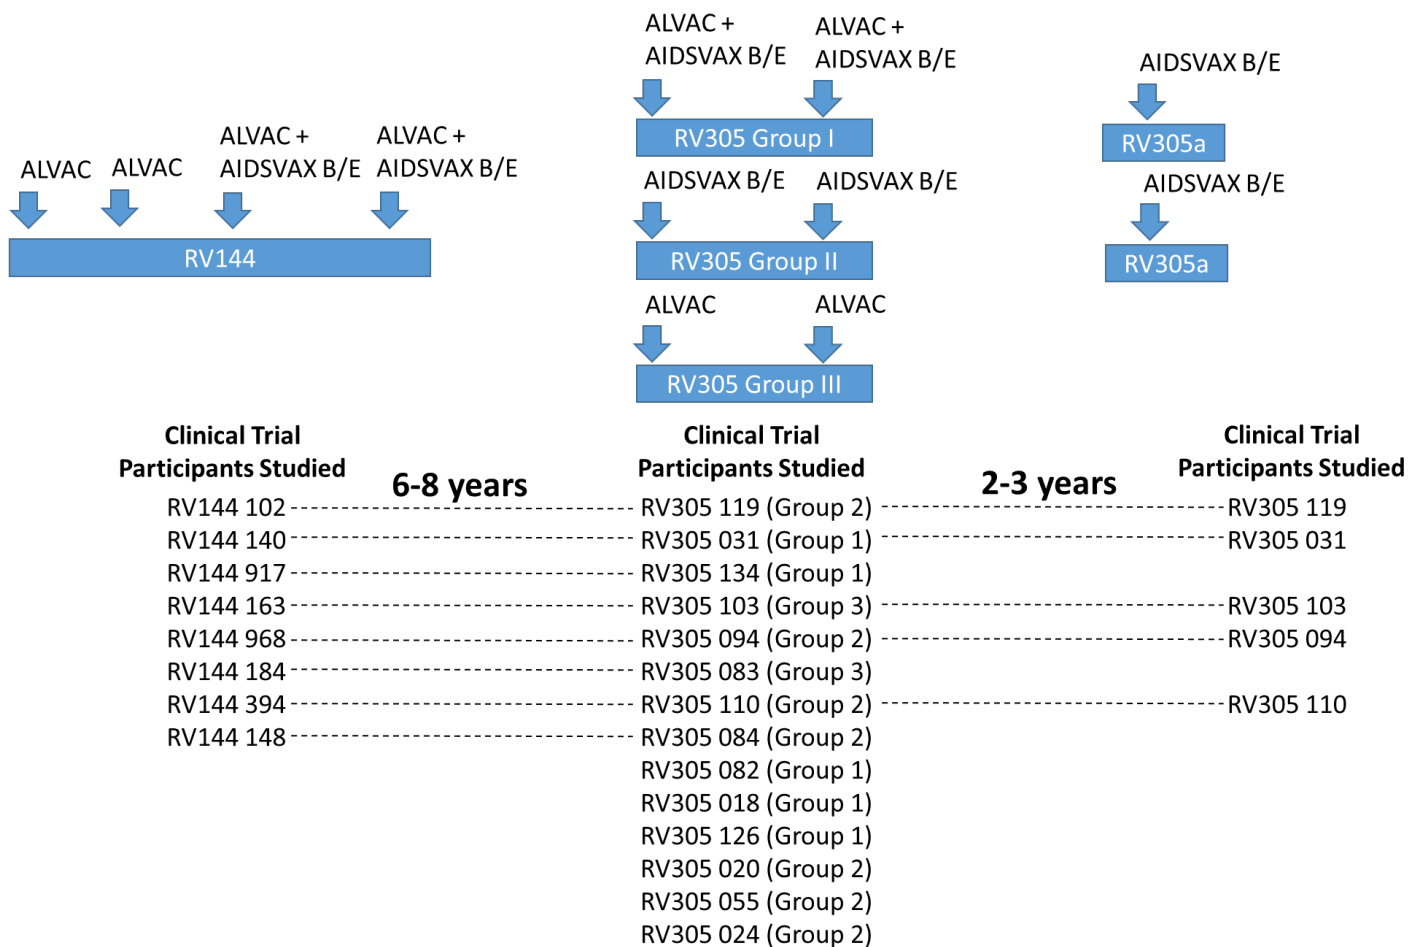

**Figure S1. Clinical trials and participants studied.** RV305 was a boosting of HIV-1 uninfected RV144 participants that occurred 6-8 years after the conclusion of RV144. In RV305 participants were boosted with either ALVAC + AIDS VAX B/E (Group I), AIDS VAX B/E (Group II) or ALVAC (Group III). In RV305a a subset of the same participants were boosted again 2-3 years later with AIDS VAX B/E. Pub IDs change from the RV144 to RV305 clinical trial but the participant is the same person. No participants from placebo groups were studied here.

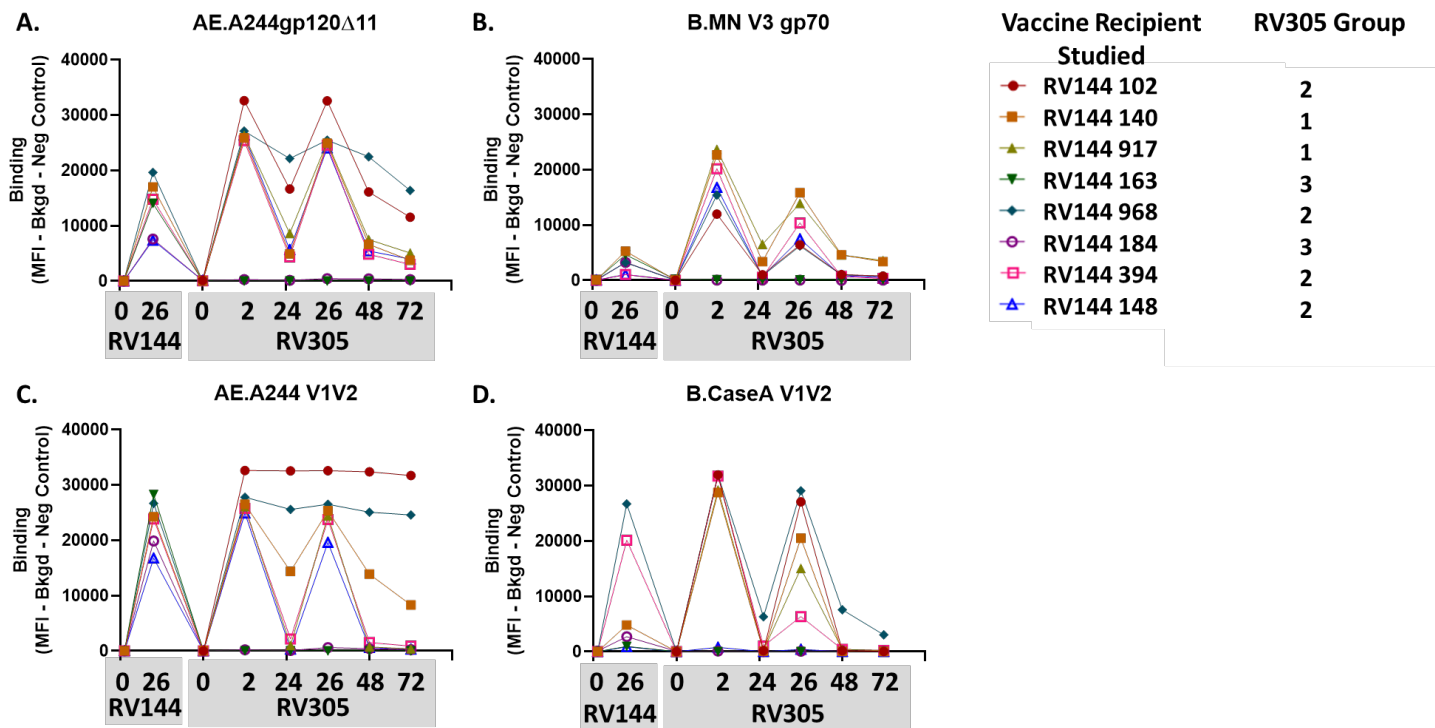

**Figure S2. Serum antibody binding to HIV Env antigens in RV144 and after boosting in RV305.** Vaccine-induced circulating plasma antibody titers of eight volunteers that participated in RV144 and were boosted 6-8 years later in the RV305 clinical trial were evaluated by binding antibody multiplex assay (BAMA) for binding to (A) AE.A244gp120 $\Delta$ 11, (B) B.MN V3 gp70, (C) AE.A244 V1V2 tags and (D) gp70 B.CaseA V1V2. Data are shown as background subtracted binding mean fluorescent intensity of plasma antibody binding for two RV144 time points (week 0 and 26) and six RV305 time points (week 0, 2, 24, 26, 48 and 72). RV305 Group 1 = ALVAC + AIDSVAxB/E boosting, RV305 Group 2 = AIDSVAxB/E boosting and RV305 Group 3 = ALVAC boosting.

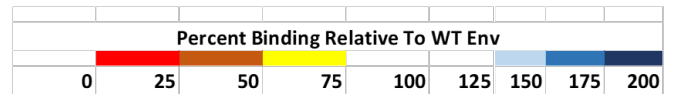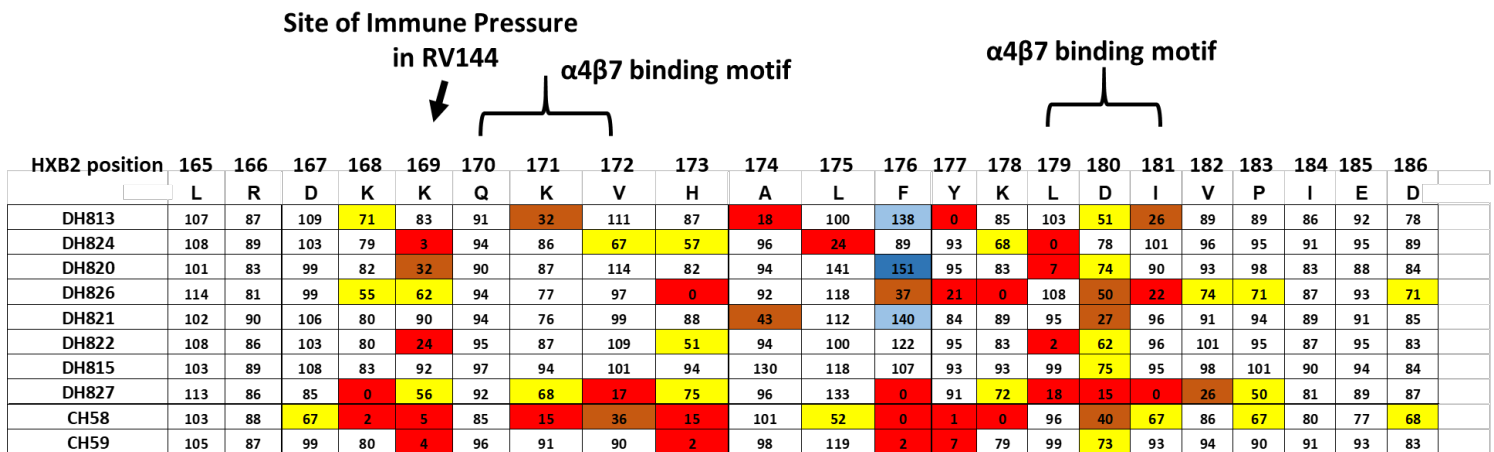

**Figure S3. Epitope mapping of linear peptide binding V2-specific mAbs by ELISA.** Individual V2 peptides with alanine point mutation (alanine to glutamic acid mutation at position 174) at each position spanning Env HXB2 number 165-186 were coated on an ELISA plate. Recombinantly expressed mAbs were assayed for binding. Data are expressed as percent binding relative to the binding WT peptide. Values are the mean of two independent experiments.

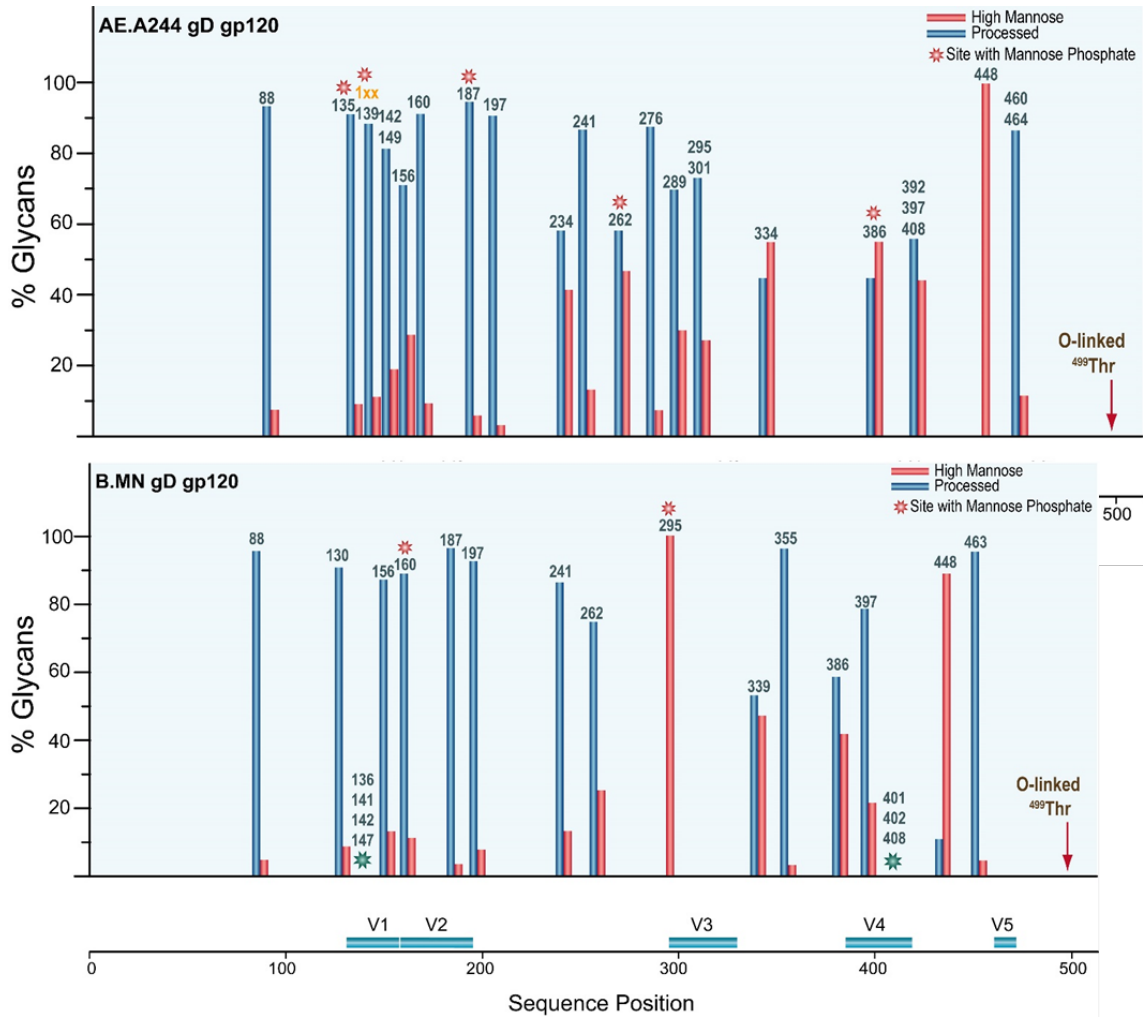

**Figure S4. Mass spectrometry analysis of the glycosylation profile of the AIDS VAX B/E AE.244 gD gp120 and B. MN gD gp120 Envs used in the RV144 and RV305 vaccine trials. Red bars show percent of high mannose residues and blue bars show percent of complex processed glycan residues.**

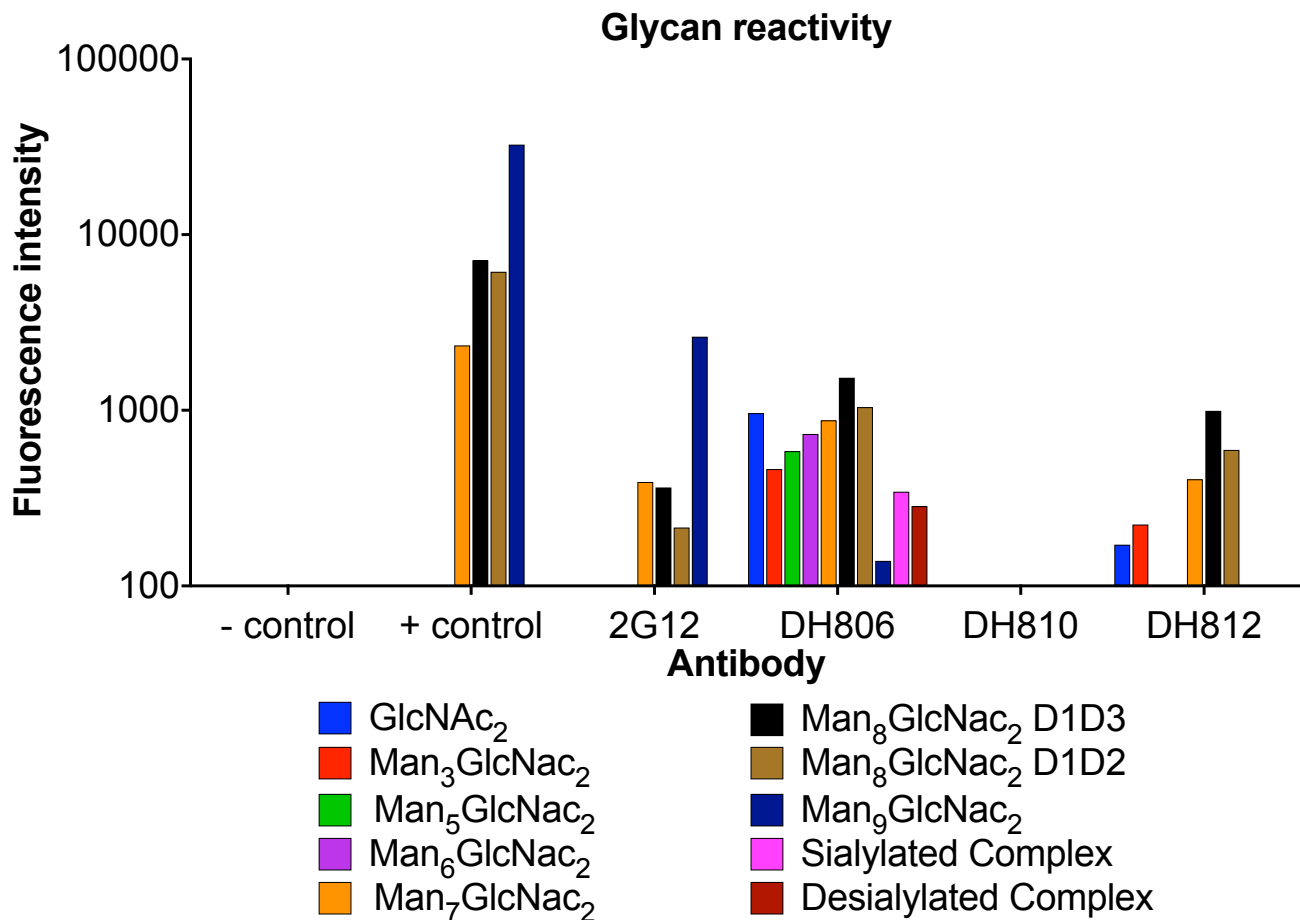

**Figure S5. RV305 glycan-dependent V1V2-specific mAb binding to free glycan.** Antibody binding to biotinylated glycans was measured by Luminex. Individual bars indicate background-subtracted binding to each glycan by each antibody. HIV-1 envelope peptide-specific antibody 19B was used as a negative control antibody, and a variant of the anti-HIV-1 envelope glycan-specific antibodies DH501 and 2G12 were used as high and low positive control mAbs. Values are the mean of two independent experiments.

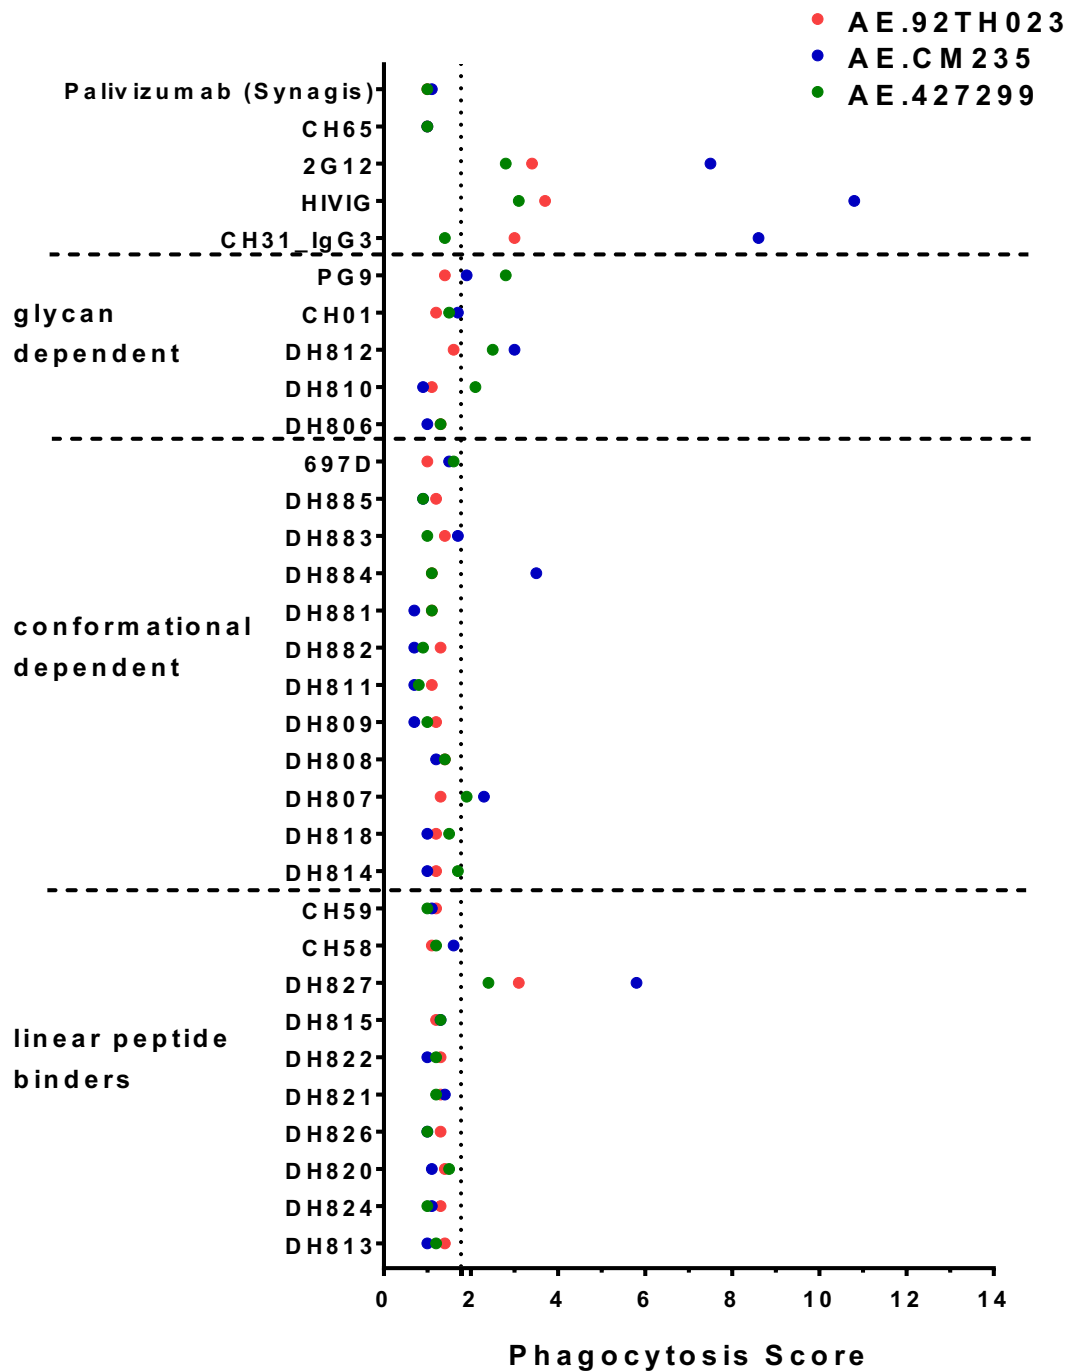

**Figure S6. Linear peptide binding, conformational dependent and glycan dependent groups of V2-specific mAb phagocytosis of fluorescently labeled virus.** Recombinantly expressed V2-specific mAbs were assayed for antibody-mediated phagocytosis of infectious HIV-1 virions (ADCP). ADCP against 3 clade A/E virion strains (92TH023, CM235, and Thai transmitted/founder strain 427299) was examined. Virions were internally labeled with Tomato fluorescence, and incubated with phagocytes (human primary monocytes) in the presence or absence of mAb. ADCP was indicated by an increase in monocyte-associated fluorescence over background, and quantified as a phagocytosis score (see Materials and Methods). The vertical black dotted line indicates the positivity cutoff at 1.77, based on the mean + 3 standard deviations of historical negative controls.
